# Supplementary material
Source: PubMed Central journal article supplement (PMC1904173)

## Heat-specific opioid activation correlated with reported placebo

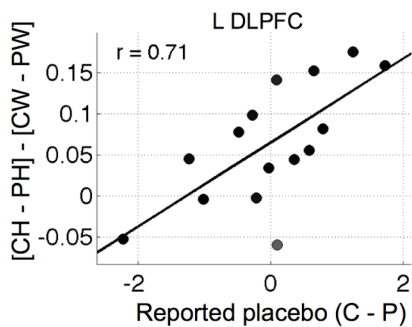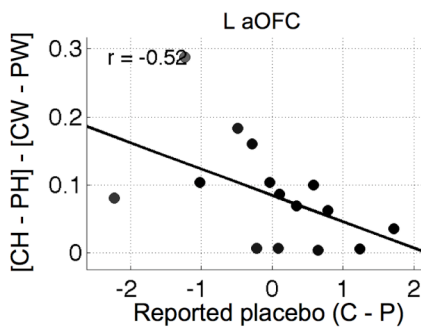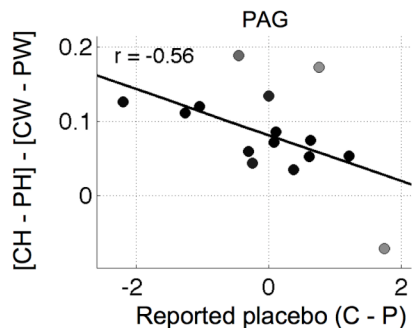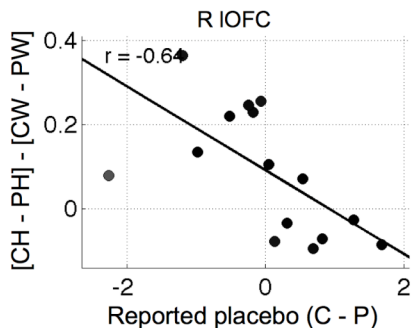

## Additional regions significant with small volume correction

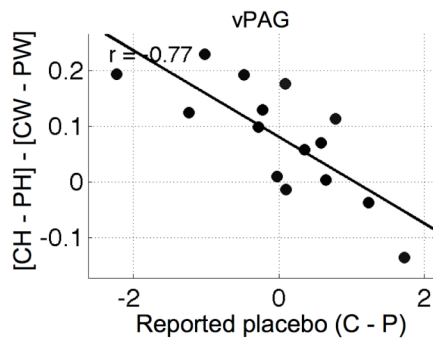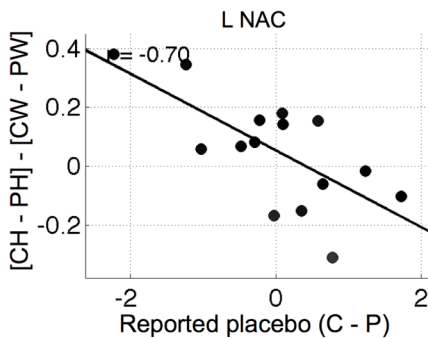

Supplement: pnas_0702413104_2.pdf [file pnas_0702413104_2.pdf]
