# Supplementary material
Source: PubMed Central journal article supplement (PMC1904173)

Placebo-induced increases during heat:  
Regions showing [CH - PH] and also correlated with RP

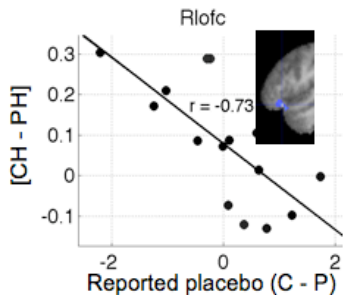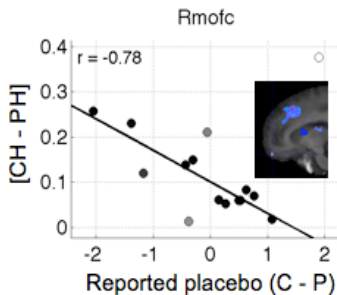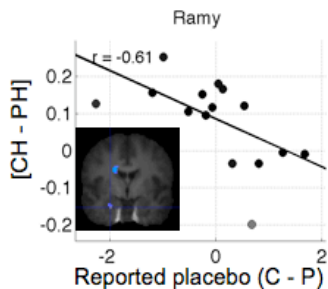

Placebo-induced decreases in anticipation:  
Regions showing [PW - CW] and also correlated with RP

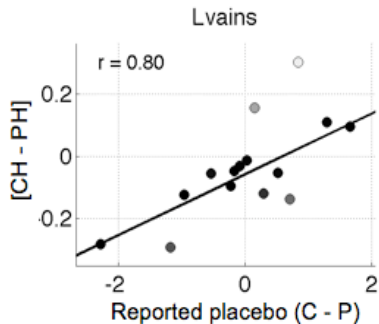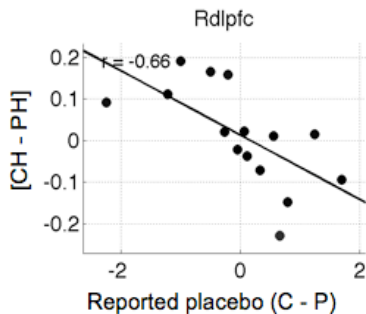

Supplement: pnas_0702413104_3.pdf [file pnas_0702413104_3.pdf]
