# Supplementary material
Source: PubMed Central journal article supplement (PMC1904173)

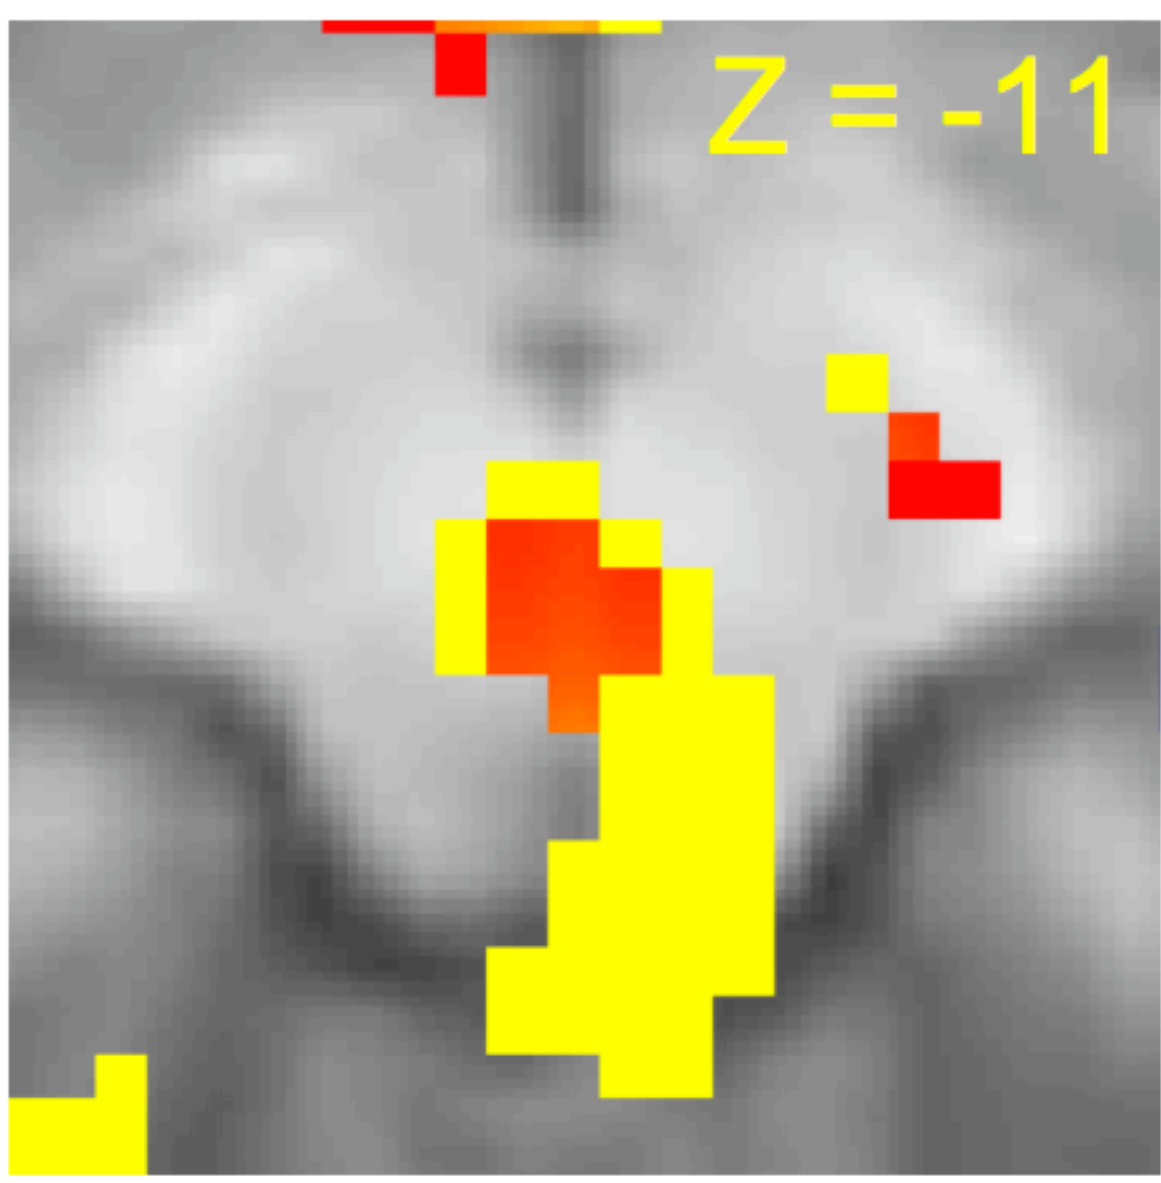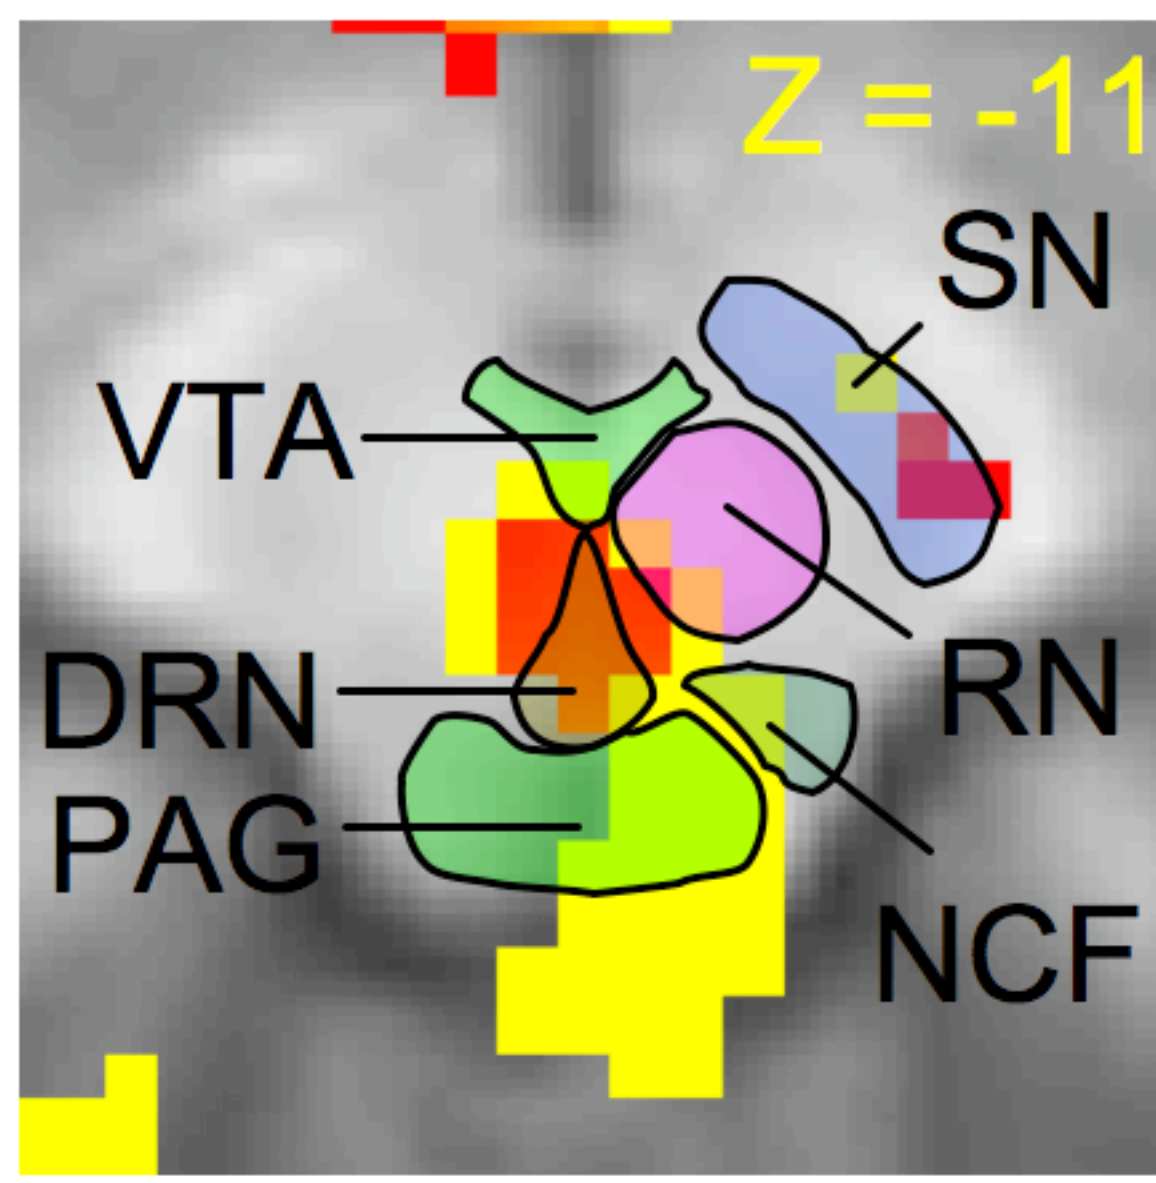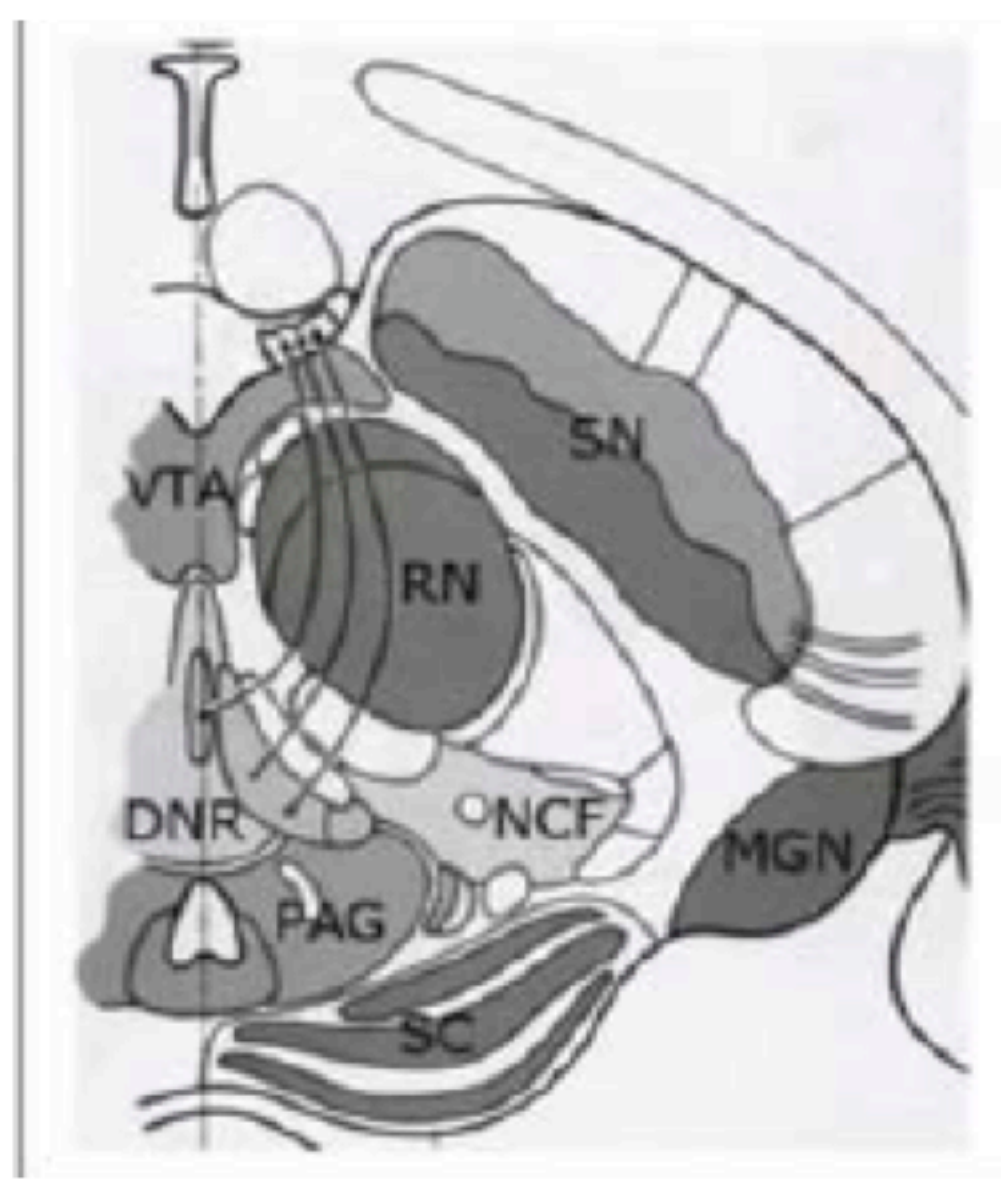

■ [CH - PH] - [CW - PW]  
■ [CH - PH]

Adapted from Duvernoy et al., 1995\*

■ [CH - PH]  
■ [PW - CW]

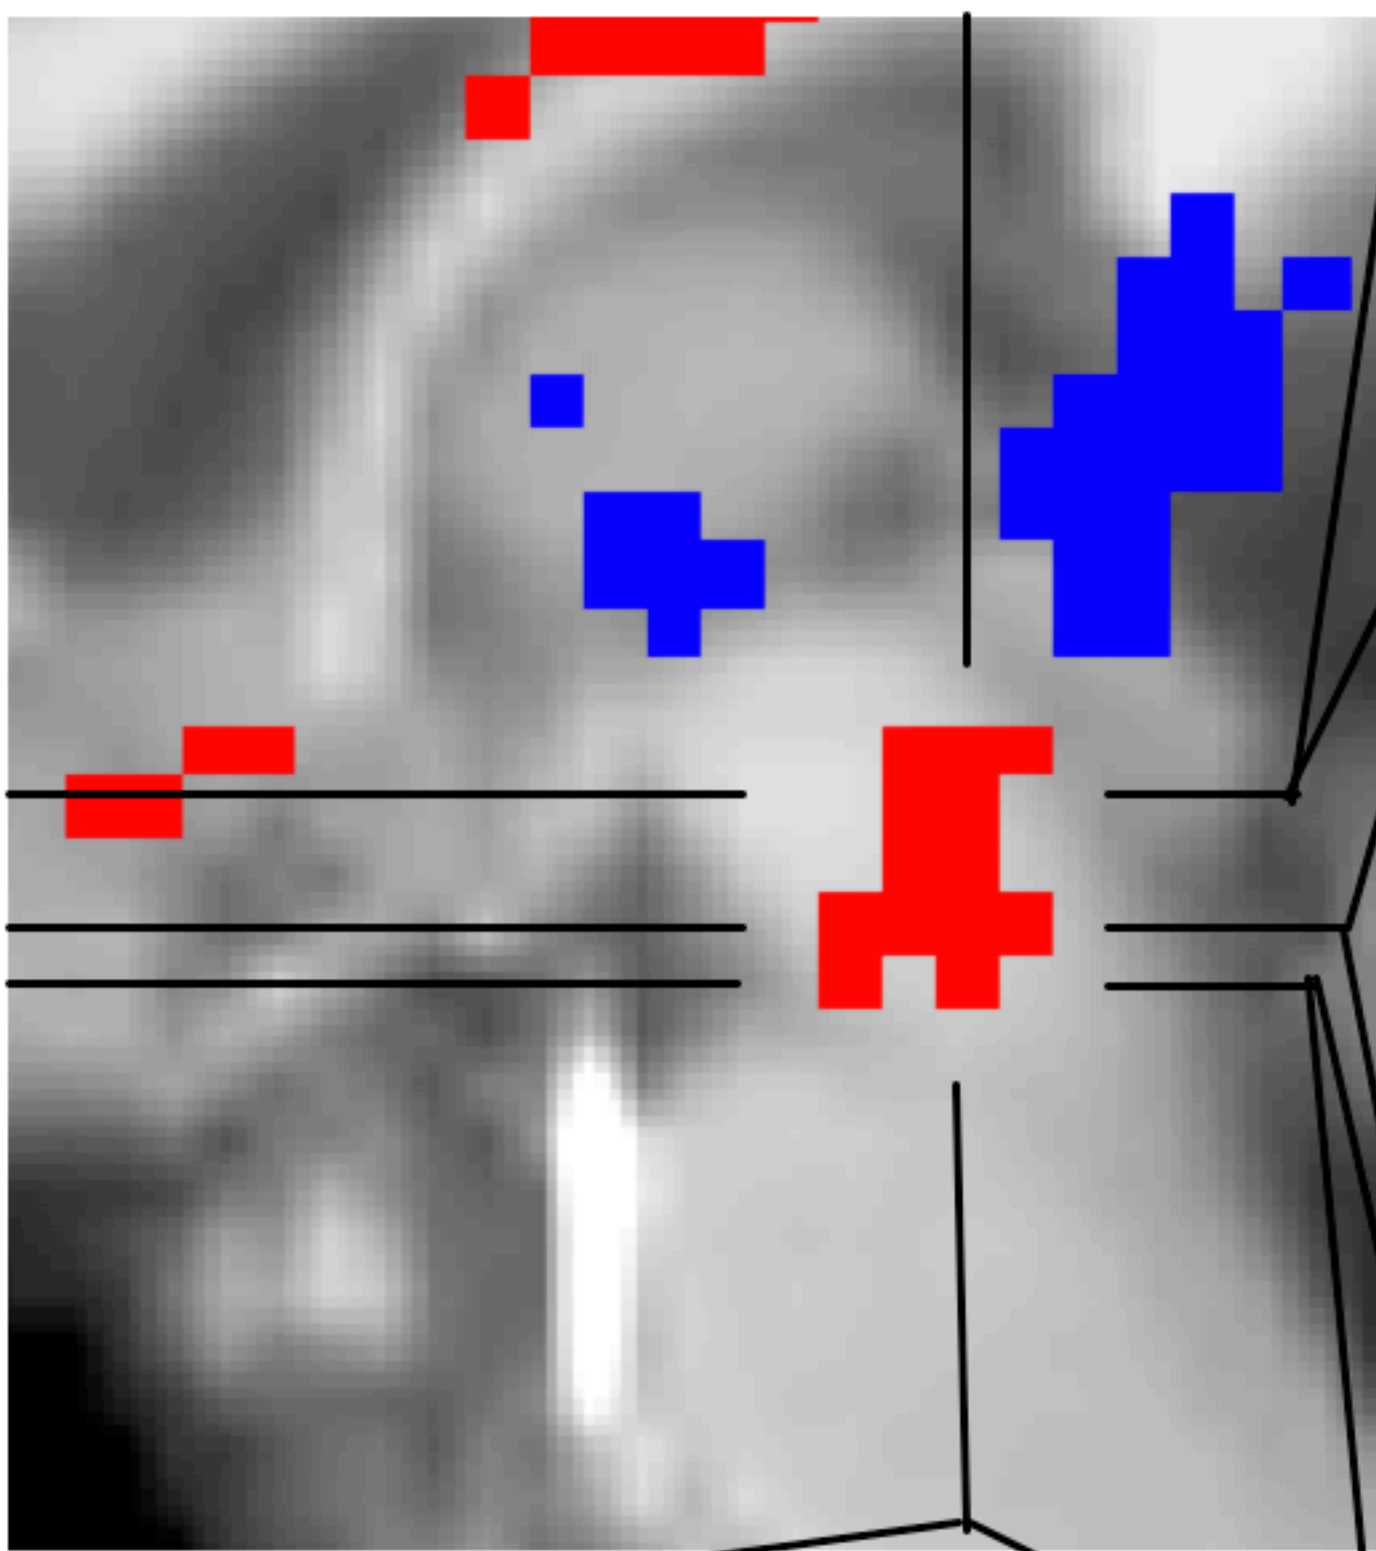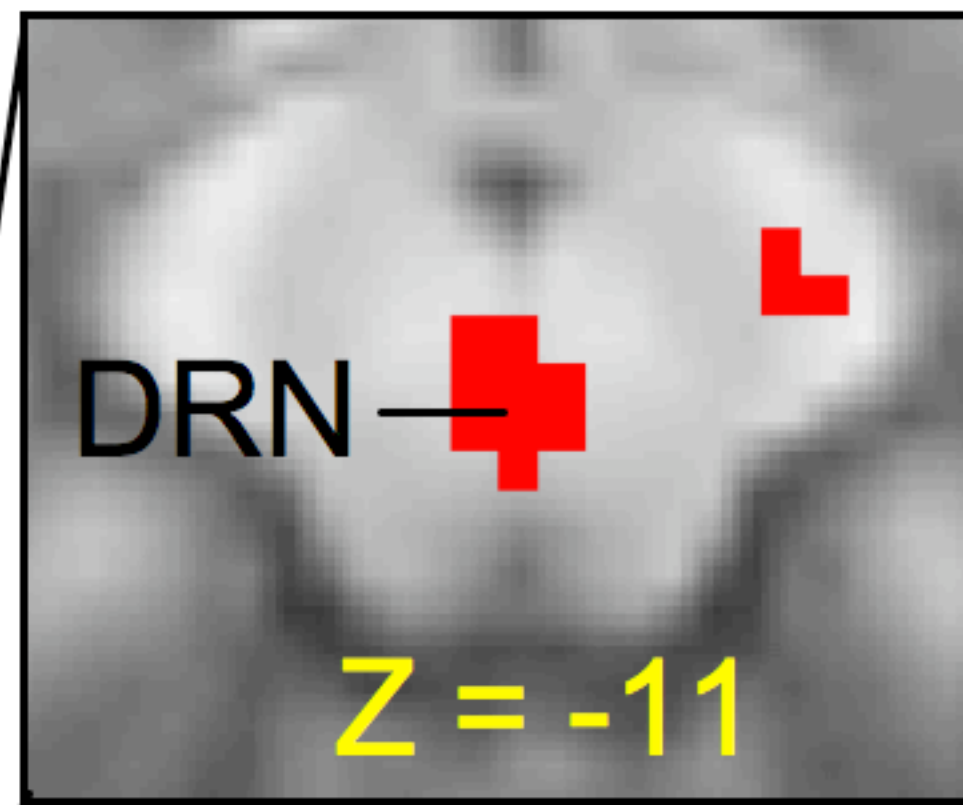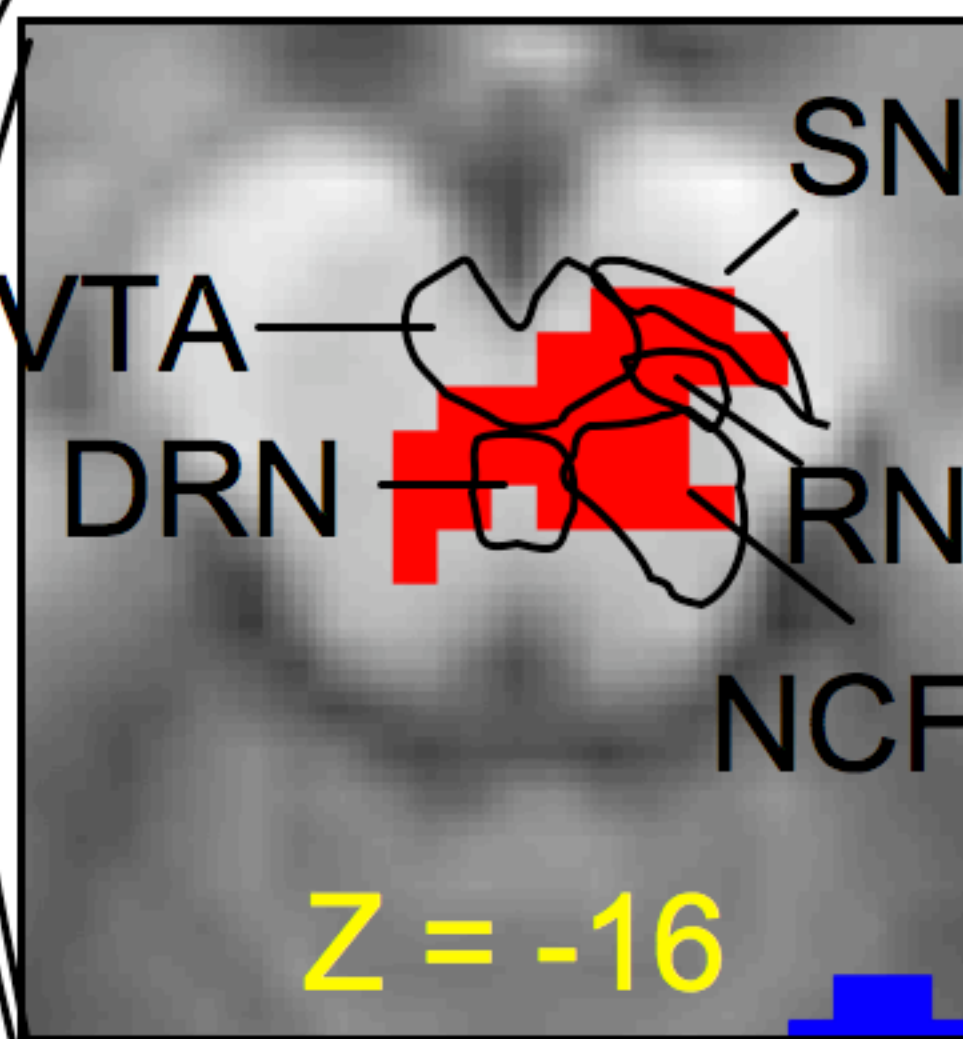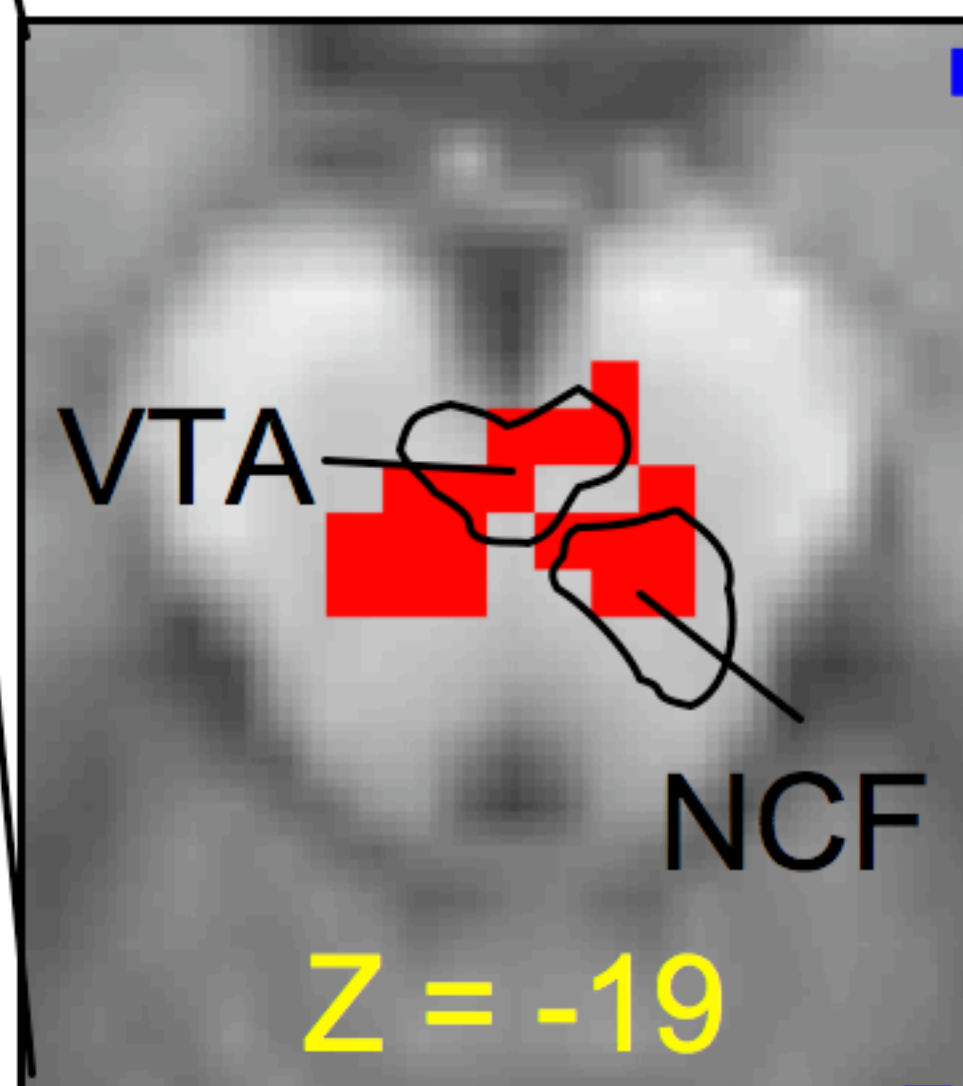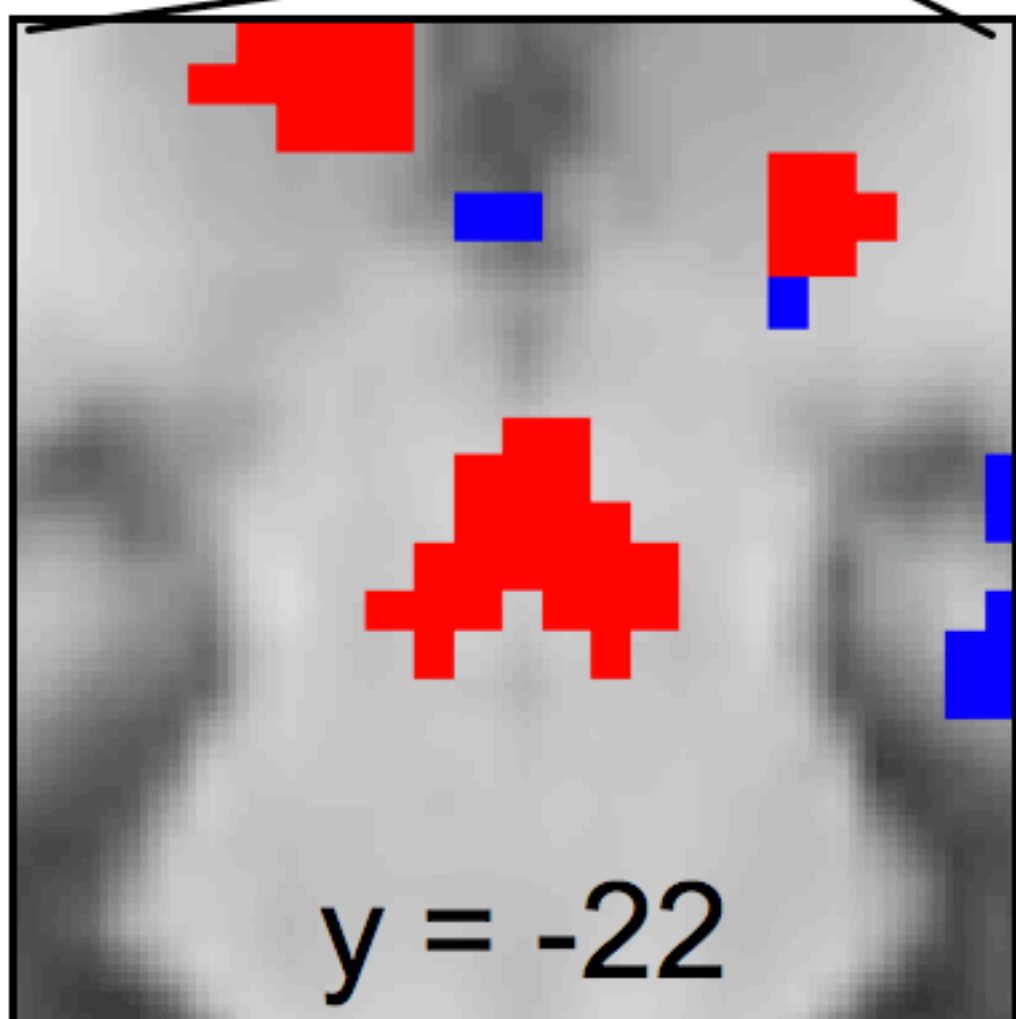

Adapted from Seymour et al., 2004

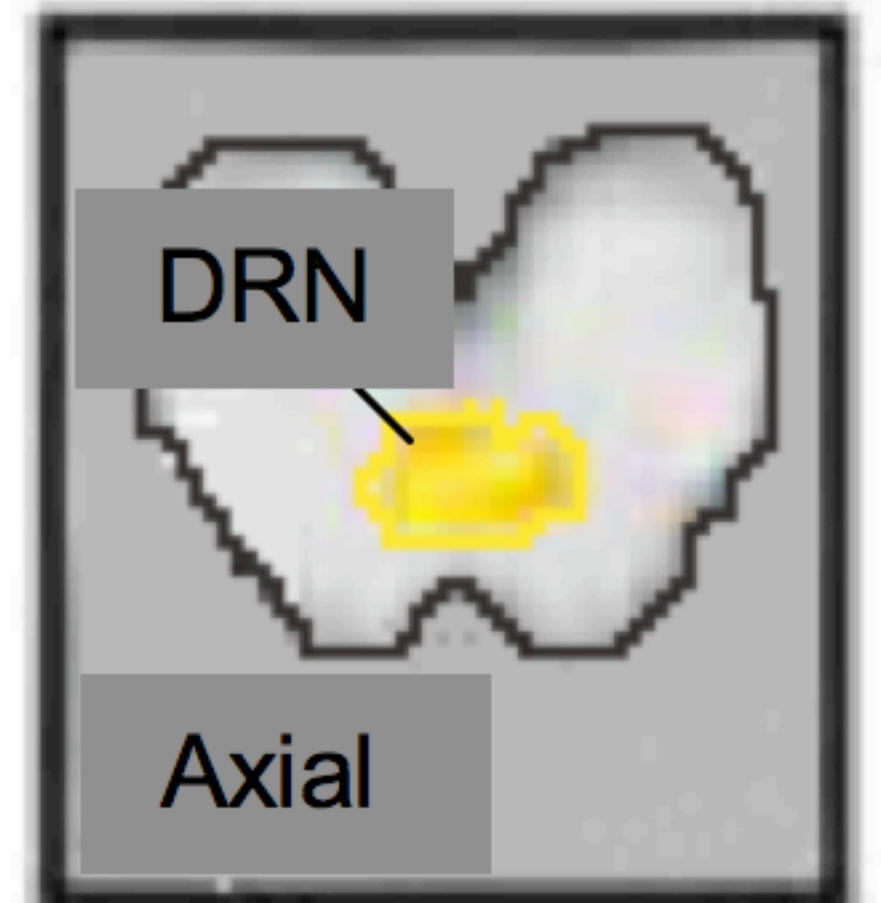

From Keltner et al., 2006

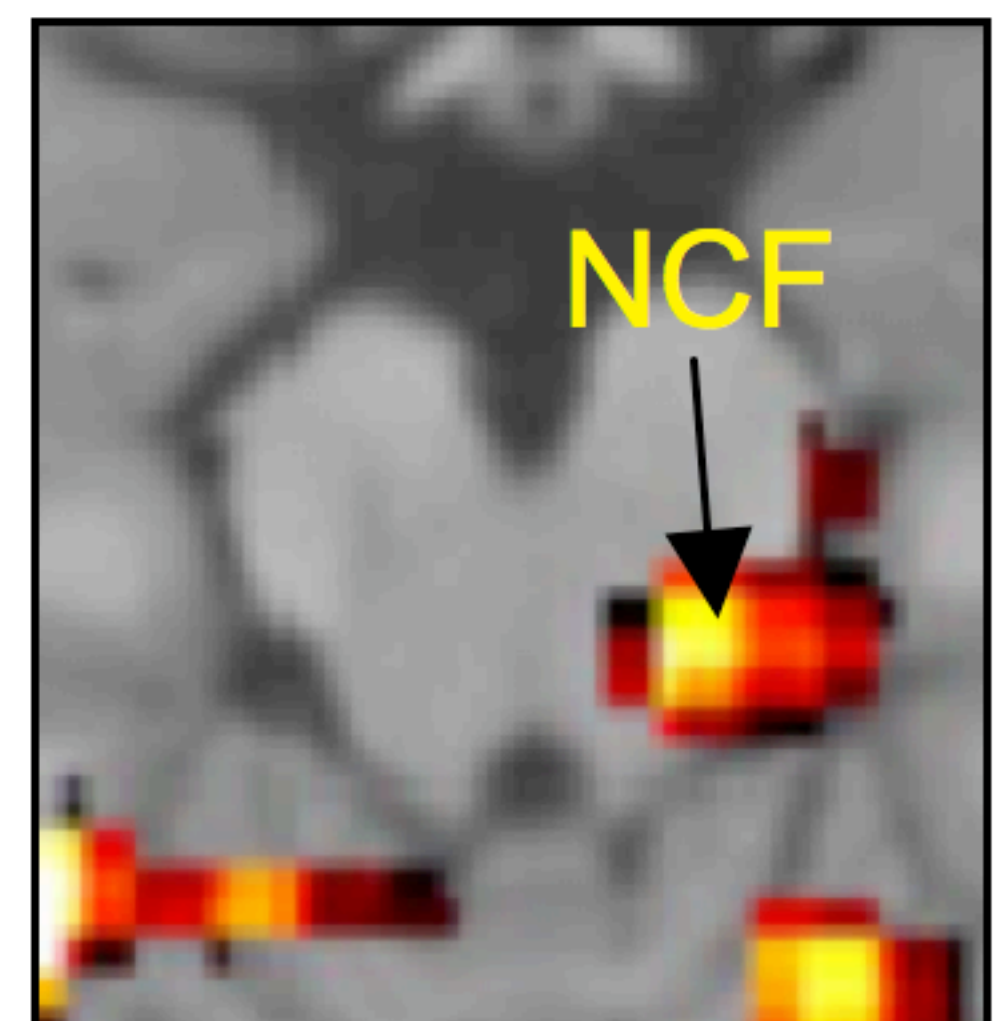

Supplement: pnas_0702413104_5.pdf [file pnas_0702413104_5.pdf]
