# Supplementary material
Source: PubMed Central journal article supplement (PMC1904173)
Supplement: pnas_0702413104_8.pdf [file pnas_0702413104_8.pdf]

**Table 1. Pain-specific opioid activation ([P-C] Heat - [C-P] Warm)**

| <b>Region</b> | <b>x</b> | <b>y</b> | <b>z</b> | <b>% Increase</b> | <b>Vol. (mm<sup>3</sup>)</b> | <b>Max T</b> | <b>SVC t-threshold</b> | <b>Correlation with RP</b> |
|---------------|----------|----------|----------|-------------------|------------------------------|--------------|------------------------|----------------------------|
| Ramy          | 22       | 0        | -29      | 7.8               | 11                           | 3.18         | 3.14                   | 0.06                       |
| Lamy          | -32      | 2        | -22      | 16.4              | 239                          | 4.95         | 3.36                   | 0.37                       |
| vmPFC         | -7       | 58       | -20      | 9.2               | 251                          | 4.23         | 3.53                   | 0.38                       |
| vmPFC         | 14       | 54       | -20      | 11.4              | 11                           | 4.69         | 3.53                   | -0.41                      |
| LaINS         | -36      | 14       | -2       | 9.2               | 46                           | 3.99         | 3.53                   | 0.25                       |
| LaINS         | -45      | 16       | -4       | 8.6               | 34                           | 3.76         | 3.53                   | 0.40                       |
| LaOFC         | -18      | 45       | -16      | 5.7               | 68                           | 4.89         | 3.53                   | -0.57 +                    |
| LaOFC         | -25      | 58       | -14      | 9.6               | 387                          | 4.41         | 3.53                   | 0.39                       |
| LaOFC         | -16      | 54       | -16      | 6.9               | 11                           | 3.57         | 3.53                   | -0.14                      |
| RaOFC         | 20       | 52       | -16      | 7.5               | 91                           | 4.52         | 3.60                   | 0.45                       |
| PAG           | -4       | -29      | -9       | 6.3               | 171                          | 4.87         | 3.11                   | -0.77 ***                  |
| RIOFC         | 50       | 25       | -14      | 6.7               | 11                           | 2.62         | 2.60                   | -0.64 *                    |
| LIOFC         | -52      | 29       | -14      | 6.4               | 103                          | 4.57         | 2.90                   | -0.60 +                    |
| peri-NAC      | -9       | 18       | -11      | 8.8               | 34                           | 2.42         | 1.80                   | 0.23                       |
| pgACC         | -11      | 40       | 7        | 9.8               | 80                           | 4.54         | 3.91                   | -0.58 *                    |
| thal          | -11      | -14      | 7        | 14.1              | 171                          | 4.82         | 3.67                   | 0.17                       |
| rACC          | 7        | 27       | 20       | 11.0              | 296                          | 5.83         | 4.11                   | -0.47 *                    |
| LDLPFC        | -47      | 4        | 38       | 5.1               | 23                           | 2.58         | 2.46                   | -0.23                      |
| LDLPFC        | -45      | 20       | 40       | 5.0               | 205                          | 4.10         | 2.92                   | 0.79 ***                   |

Regions showing significant placebo effects in heat as compared with warm stimulation. Abbreviations are given in the text. All effects are increases (positive effects). X, y, and z refer to activation center of mass coordinates in mm relative to the anterior commissure in Montreal Neurological Institute space (based on the SPM2 avg152T1.img template brain). Vol.: volume of activation. Max T: maximum absolute t-value in the region. SVC t-threshold: nonparametric significance threshold for small-volume corrected (SVC) significance at corrected  $p < .05$ , one tailed. Correlation with RP: Maximum absolute partial correlation among activated voxels between opioid activity ([P – C Heat] vs. [C – P Warm]) and reported placebo analgesia (RP). % Increase: Placebo effect expressed as a percentage of baseline binding. Baseline binding was calculated as the average binding in the high-opioid-binding mask (average binding = 1.30 across regions). +,  $P < .10$ ; \*,  $P < .05$ ; \*\*\*,  $P < .005$ , all two-tailed. L, left; R, right.
