# Supplementary material
Source: PubMed Central journal article supplement (PMC1904173)
Supplement: pnas_0702413104_9.pdf [file pnas_0702413104_9.pdf]

Table 2. Regions showing simple effects of placebo during heat or anticipation

| <b>Region</b>                                         | <b>x</b> | <b>y</b> | <b>z</b> | <b>Vol.<br/>(mm<sup>3</sup>)</b> | <b>Max T</b> | <b>SVC t-<br/>threshold</b> | <b>Correlation<br/>with RP</b> |
|-------------------------------------------------------|----------|----------|----------|----------------------------------|--------------|-----------------------------|--------------------------------|
| <b>Placebo effects in heat ([P - C] Heat)</b>         |          |          |          |                                  |              |                             |                                |
| <i>Increases</i>                                      |          |          |          |                                  |              |                             |                                |
| Ramy                                                  | -25      | -2       | -27      | 23                               | 3.53         | 3.15                        | -0.61 *                        |
| Rmofc                                                 | -14      | 54       | -20      | 11                               | 3.90         | 3.22                        | -0.78 **                       |
| Lmofc                                                 | 7        | 61       | -20      | 46                               | 3.42         | 3.22                        | 0.30                           |
| LaOFC                                                 | 27       | 56       | -14      | 900                              | 6.51         | 3.47                        | 0.58 +                         |
| RaOFC                                                 | -29      | 58       | -9       | 296                              | 4.27         | 3.36                        | -0.44                          |
| RIOFC                                                 | -50      | 25       | -14      | 34                               | 2.97         | 2.60                        | -0.73 **                       |
| LIOFC                                                 | 50       | 29       | -14      | 34                               | 3.21         | 2.74                        | -0.32                          |
| <i>Decreases</i>                                      |          |          |          |                                  |              |                             |                                |
|                                                       | -14      | 7        | 11       | 444                              | -2.93        | 2.12                        | -0.45                          |
|                                                       | 38       | 11       | 56       | 376                              | -2.96        | 2.33                        | -0.53                          |
| <b>Placebo effects in anticipation ([P - C] Warm)</b> |          |          |          |                                  |              |                             |                                |
| <i>Increases</i>                                      |          |          |          |                                  |              |                             |                                |
| No significant regions                                |          |          |          |                                  |              |                             |                                |
| <i>Decreases</i>                                      |          |          |          |                                  |              |                             |                                |
| Lamy                                                  | 29       | 0        | -27      | 638                              | -3.68        | 2.73                        | 0.33                           |
| LIOFC                                                 | 36       | 25       | -22      | 11                               | -3.05        | 2.75                        | 0.32                           |
| Lvains                                                | 40       | 20       | -20      | 11                               | -2.84        | 2.75                        | 0.01                           |
| Lvains                                                | 43       | 18       | -14      | 23                               | -2.85        | 2.75                        | -0.06                          |
| pag                                                   | 4        | -29      | -4       | 57                               | -2.30        | 2.20                        | 0.17                           |
| pgACC                                                 | -4       | 43       | 0        | 125                              | -2.70        | 2.57                        | 0.11                           |
| Lcau                                                  | 18       | 7        | 11       | 478                              | -2.31        | 1.71                        | 0.41                           |
| Rifj                                                  | -43      | 2        | 25       | 159                              | -3.35        | 2.49                        | -0.47                          |
| RDLPFC                                                | -47      | 4        | 50       | 11                               | -2.51        | 2.49                        | -0.28                          |
| RDLPFC                                                | -29      | 9        | 56       | 11                               | -2.16        | 2.13                        | -0.51 +                        |

Warm stimulation always preceded hot stimulation, and so is referred to as 'anticipation.' Column labels are as in Supporting Information Table 1. +,  $P < .10$ ; \*,  $P < .05$ ; \*\*,  $P < .01$ ; \*\*\*,  $p < .005$ , all two-tailed. L, left; R, right.
