# Supplementary material
Source: PubMed Central journal article supplement (PMC1904173)
Supplement: pnas_0702413104_10.pdf [file pnas_0702413104_10.pdf]

**Table 3. Correlations among functional opioid networks***Noxious heat vs. warm (PH + CH) - (PW + CW)*

| <b>Network</b> | <b>Network</b> | <b>Direction</b> | $\rho_{heat}$ | $\rho_{warm}$ | <b>Z</b> | <b>p</b> |
|----------------|----------------|------------------|---------------|---------------|----------|----------|
| DLPFC          | OFC            | +                | 0.53          | 0.32          | 2.17     | 0.030    |
| DLPFC/dACC     | OFC            | +                | 0.08          | -0.22         | 2.40     | 0.017    |
| Limbic         | OFC            | +                | 0.54          | 0.26          | 2.21     | 0.027    |

*Placebo vs. control during heat (PH - CH)*

| <b>Network</b> | <b>Network</b> | <b>Direction</b> | $\rho_{placebo}$ | $\rho_{control}$ | <b>Z</b> | <b>p</b> |
|----------------|----------------|------------------|------------------|------------------|----------|----------|
| rACC/Cau       | PAG/rACC       | +                | 0.69             | 0.07             | 2.25     | 0.024    |

*Placebo vs. control during warm (PW - CW)*

| <b>Network</b> | <b>Network</b> | <b>Direction</b> | $\rho_{placebo}$ | $\rho_{control}$ | <b>Z</b> | <b>p</b> |
|----------------|----------------|------------------|------------------|------------------|----------|----------|
| rACC/Cau       | PAG/rACC       | +                | 0.48             | 0.00             | 1.72     | 0.086    |

Networks correspond to the colored sets of regions in Fig. 4 and Fig. S7. Correspondences are as follows: DLPFC, magenta-colored regions in Fig. 4; DLPFC/ACC, red; OFC, yellow; Limbic, blue; rACC/Cau, black; PAG/rACC, green.  $\rho$  refers to Spearman's rho, and Z refers to  $\bar{Z}_2^*$  from Steiger, 1980 (1). *P*-values are two-tailed.

1. Steiger, J. H. (1980) *Psychological Bulletin* **87**, 245-251.
