# Supplementary material
Source: PubMed Central journal article supplement (PMC1904173)
Supplement: pnas_0702413104_11.pdf [file pnas_0702413104_11.pdf]

**Table 4. Placebo-dependent correlations in opioid activity during noxious heat**  
*Placebo vs. control during heat (PH - CH), Increases*

| Region 1 | Region 2 | Direction | $\rho_{placebo}$ | $\rho_{control}$ | Z    | p     |
|----------|----------|-----------|------------------|------------------|------|-------|
| Lnac     | LaINS    | +         | 0.80             | -0.04            | 3.00 | 0.003 |
| Lamy     | LDLPFC   | +         | 0.69             | -0.16            | 2.76 | 0.006 |
| LaINS    | pgACC    | +         | 0.86             | 0.24             | 2.73 | 0.006 |
| RaOFC    | Lcau     | +         | 0.80             | 0.03             | 2.67 | 0.008 |
| RIOFC    | RDLPFC   | +         | 0.80             | 0.15             | 2.67 | 0.008 |
| Lamy     | Lcau     | +         | 0.80             | 0.06             | 2.64 | 0.008 |
| Lamy     | LNAC     | +         | 0.81             | 0.20             | 2.61 | 0.009 |
| Ramy     | LNAC     | +         | 0.72             | 0.16             | 2.59 | 0.010 |
| LaINS    | RaOFC    | +         | 0.42             | -0.25            | 2.54 | 0.011 |
| Lamy     | LaINS    | +         | 0.82             | 0.21             | 2.46 | 0.014 |
| LaINS    | LaINS    | +         | 0.77             | 0.13             | 2.41 | 0.016 |
| Lmofc    | rACC     | +         | 0.40             | -0.32            | 2.39 | 0.017 |
| LNAC     | LaINS    | +         | 0.85             | 0.37             | 2.37 | 0.018 |
| LaINS    | LaINS    | +         | 0.69             | -0.03            | 2.35 | 0.019 |
| Lamy     | pgACC    | +         | 0.91             | 0.60             | 2.35 | 0.019 |
| PAG      | rACC     | +         | 0.71             | 0.06             | 2.31 | 0.021 |
| LaINS    | Rmofc    | +         | 0.42             | -0.12            | 2.30 | 0.021 |
| LaINS    | rACC     | +         | 0.50             | -0.27            | 2.26 | 0.024 |
| LIOFC    | LaINS    | +         | 0.70             | 0.13             | 2.25 | 0.025 |
| LIOFC    | Rifj     | +         | 0.56             | -0.08            | 2.19 | 0.028 |
| LaOFC    | rACC     | +         | 0.29             | -0.45            | 2.17 | 0.030 |
| Lamy     | LDLPFC   | +         | 0.55             | -0.06            | 2.17 | 0.030 |
| Lamy     | RaOFC    | +         | 0.51             | -0.12            | 2.14 | 0.032 |
| Lamy     | RDLPFC   | +         | 0.43             | -0.21            | 2.14 | 0.032 |
| Lamy     | LDLPFC   | +         | 0.70             | 0.08             | 2.11 | 0.035 |
| LaINS    | LaINS    | +         | 0.72             | 0.18             | 2.07 | 0.038 |
| LaINS    | LaINS    | +         | 0.72             | 0.13             | 2.07 | 0.038 |
| LNAC     | pgACC    | +         | 0.86             | 0.50             | 2.07 | 0.038 |
| LaINS    | Rifj     | +         | 0.72             | 0.16             | 2.07 | 0.038 |
| RaOFC    | rACC     | +         | 0.21             | -0.49            | 2.07 | 0.039 |
| PAG      | Rcau     | +         | 0.65             | 0.04             | 2.06 | 0.039 |
| Lamy     | RaOFC    | +         | 0.88             | 0.54             | 2.05 | 0.041 |
| RaOFC    | pgACC    | +         | 0.79             | 0.33             | 2.03 | 0.043 |
| Lamy     | LaINS    | +         | 0.71             | 0.19             | 2.00 | 0.046 |
| LaINS    | Lcau     | +         | 0.45             | -0.24            | 1.98 | 0.048 |
| LNAC     | rACC     | +         | 0.26             | -0.40            | 1.96 | 0.050 |

*Placebo vs. control during heat (PH - CH), Decreases*

| Region | Region | Direction | $\rho_{placebo}$ | $\rho_{control}$ | Z     | p     |
|--------|--------|-----------|------------------|------------------|-------|-------|
| LIOFC  | LaINS  | -         | 0.37             | 0.85             | -2.46 | 0.014 |
| LDLPFC | RDLPFC | -         | 0.68             | 0.93             | -2.46 | 0.014 |
| pgACC  | Rsfs   | -         | 0.28             | 0.82             | -2.33 | 0.020 |
| RIOFC  | thal   | -         | 0.11             | 0.63             | -2.10 | 0.036 |
| LNAC   | Rsfs   | -         | 0.17             | 0.74             | -2.02 | 0.043 |

The information in this table corresponds to the lines in Fig. 12. Region names are provided in the legends of Fig. 2 and Fig. 6.  $\rho$  refers to Spearman's rho, and Z refers to  $\bar{Z}_2^*$  from Steiger, 1980 (1). P-values are two-tailed. L, left; R, right.

1. Steiger, J. H. (1980) *Psychological Bulletin* **87**, 245-251.
