# Supplementary material
Source: PubMed Central journal article supplement (PMC1904173)

**A**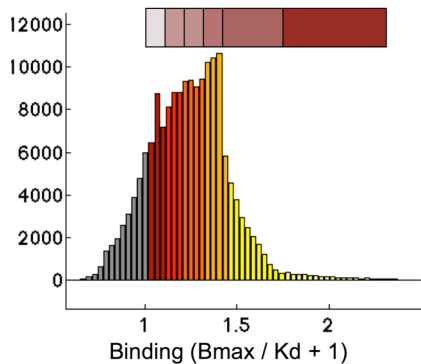**B**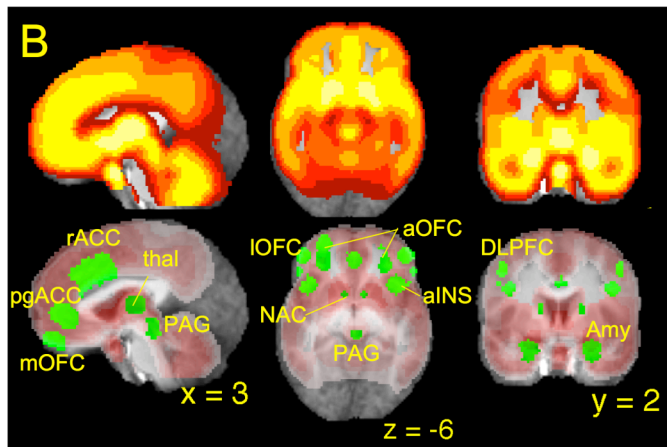**C**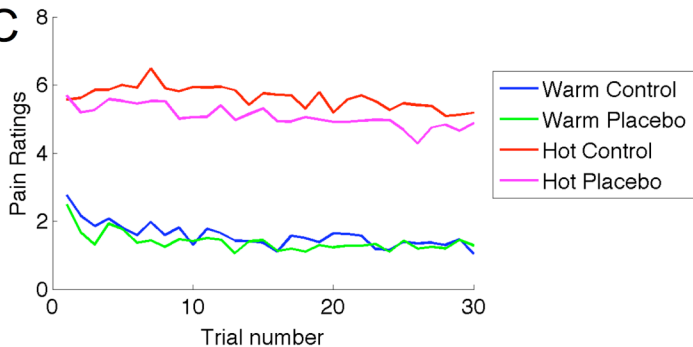

Supplement: pnas_0702413104_1.pdf [file pnas_0702413104_1.pdf]

**A**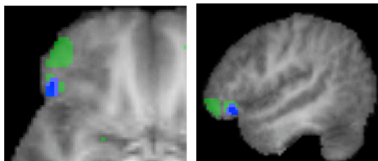**B**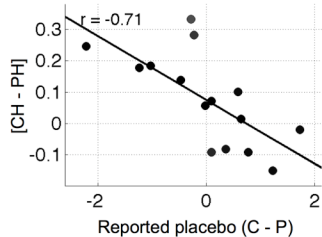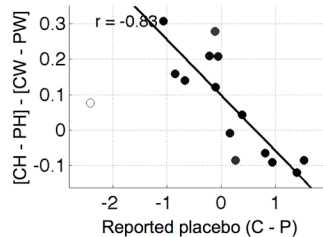**C**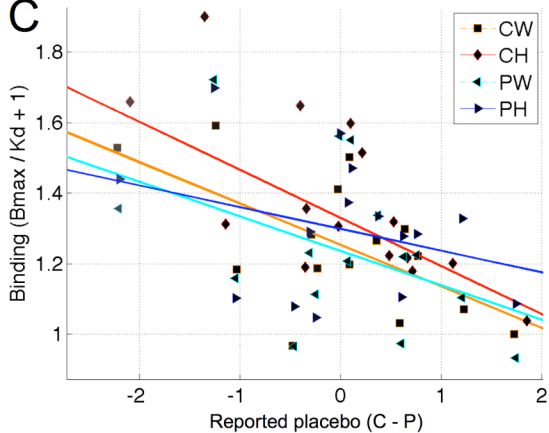**D**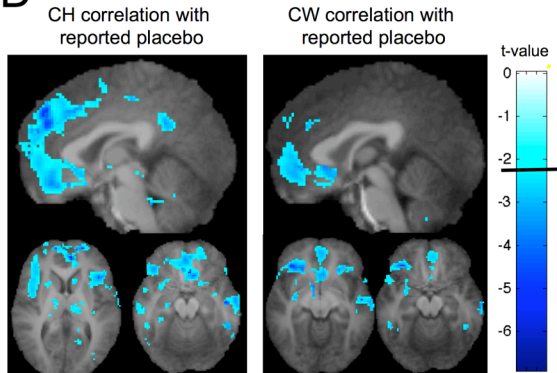

Supplement: pnas_0702413104_4.pdf [file pnas_0702413104_4.pdf]

**A** Stress by dimensions in model

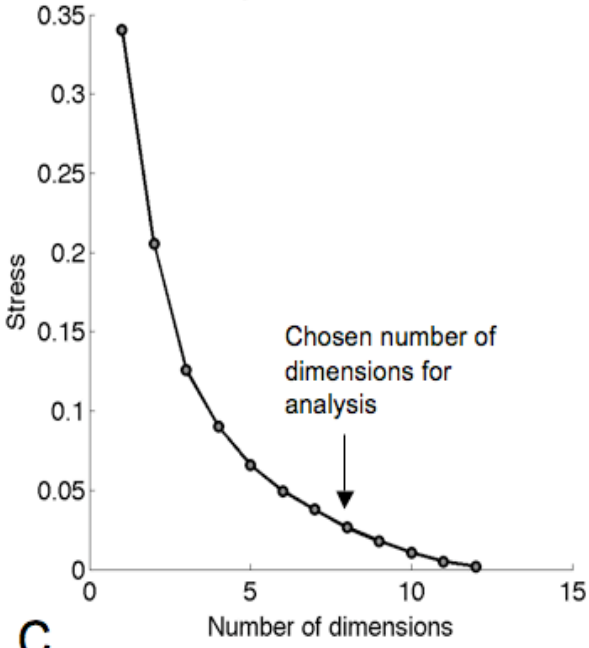

**B**

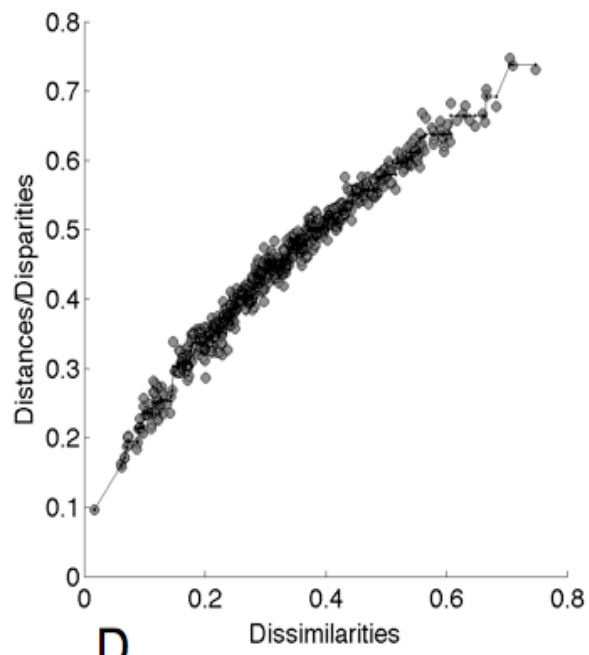

**C**

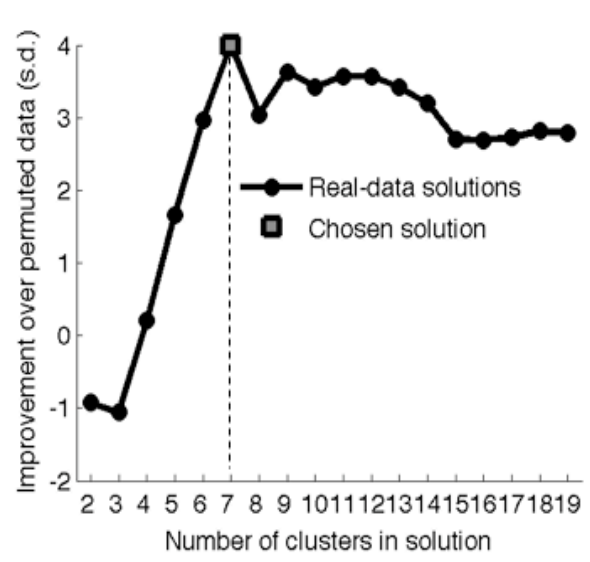

**D**

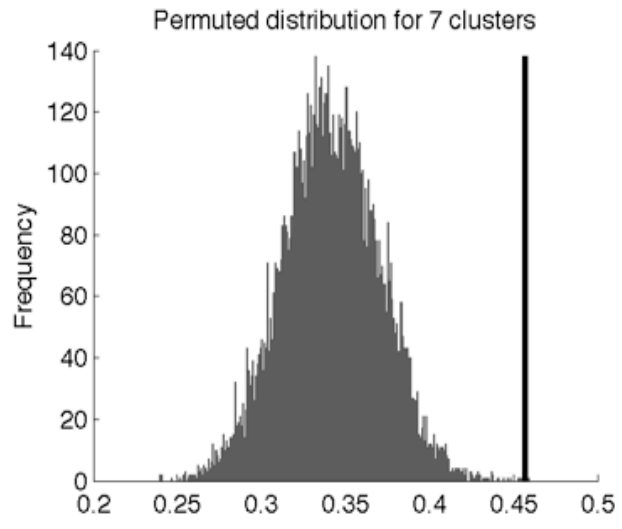

Supplement: pnas_0702413104_6.pdf [file pnas_0702413104_6.pdf]

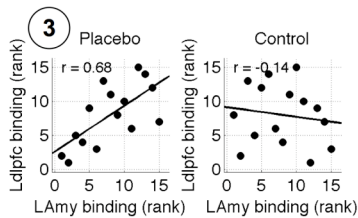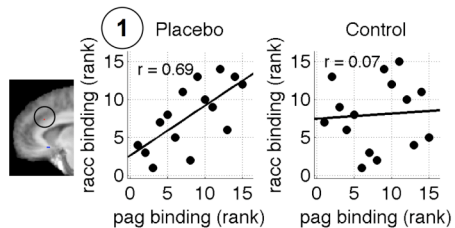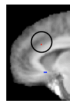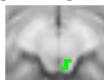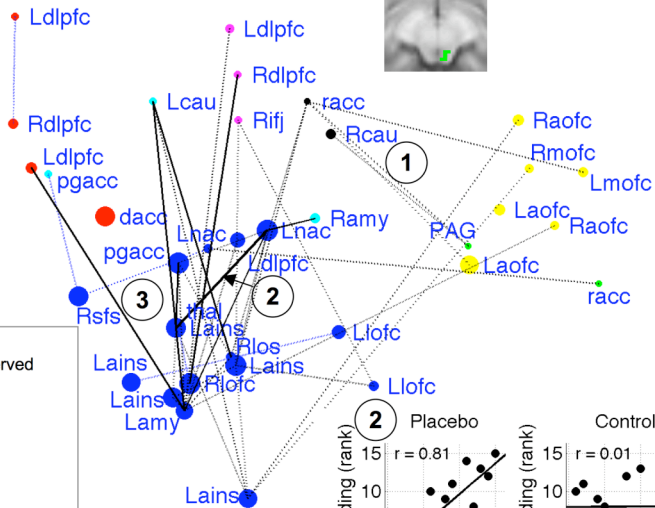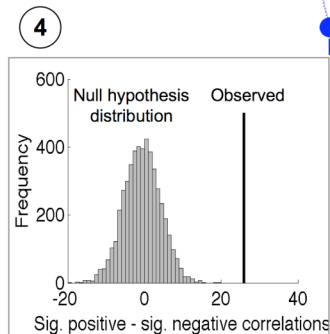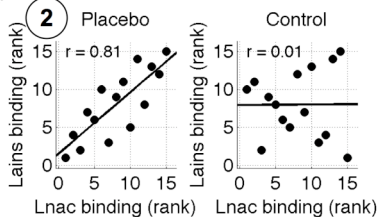

Supplement: pnas_0702413104_7.pdf [file pnas_0702413104_7.pdf]
